# Supplementary material for: Palladin isoforms 3 and 4 regulate cancer-associated fibroblast pro-tumor functions in pancreatic ductal adenocarcinoma
Source: PubMed Central journal article supplement (PMC7884442; doi:10.1038/s41598-021-82937-3), 2021-02-15
Supplement: 41598_2021_82937_MOESM1_ESM.pdf [file 41598_2021_82937_MOESM1_ESM.pdf]

**Title:** Palladin isoforms 3 and 4 regulate cancer-associated fibroblast pro-tumor functions in pancreatic ductal adenocarcinoma

**Short Title:** Palladin isoforms regulate pro-tumor CAF functions

**Authors:** Alexander, J.I.<sup>1,2</sup>., Vendramini-Costa, D.B.<sup>1</sup>., Francescone, R.<sup>1</sup>., Luong, T.<sup>1</sup>., Franco-Barraza, J.<sup>1</sup>., Shah, N.<sup>1</sup>., Gardiner, J.C.<sup>1</sup>., Nicolas, E.<sup>1</sup>., Raghavan, K.S.<sup>1,2</sup>. and Cukierman, E.<sup>1,\*</sup>.

**Author Affiliations:**

<sup>1</sup> Cancer Biology and the Marvin & Concetta Greenberg Pancreatic Cancer Institute; Fox Chase Cancer Center, Philadelphia, PA.

<sup>2</sup> Molecular, Cellular Biology and Genetics Program, College of Medicine, Drexel University, Philadelphia, PA.

\* Corresponding Author: [Edna.Cukierman@FCCC.edu](mailto:Edna.Cukierman@FCCC.edu) [ednacukierman@gmail.com](mailto:ednacukierman@gmail.com)  
(ORCID 0000-0002-1452-9576)

## Supplemental figures

# Supplemental Figure 1

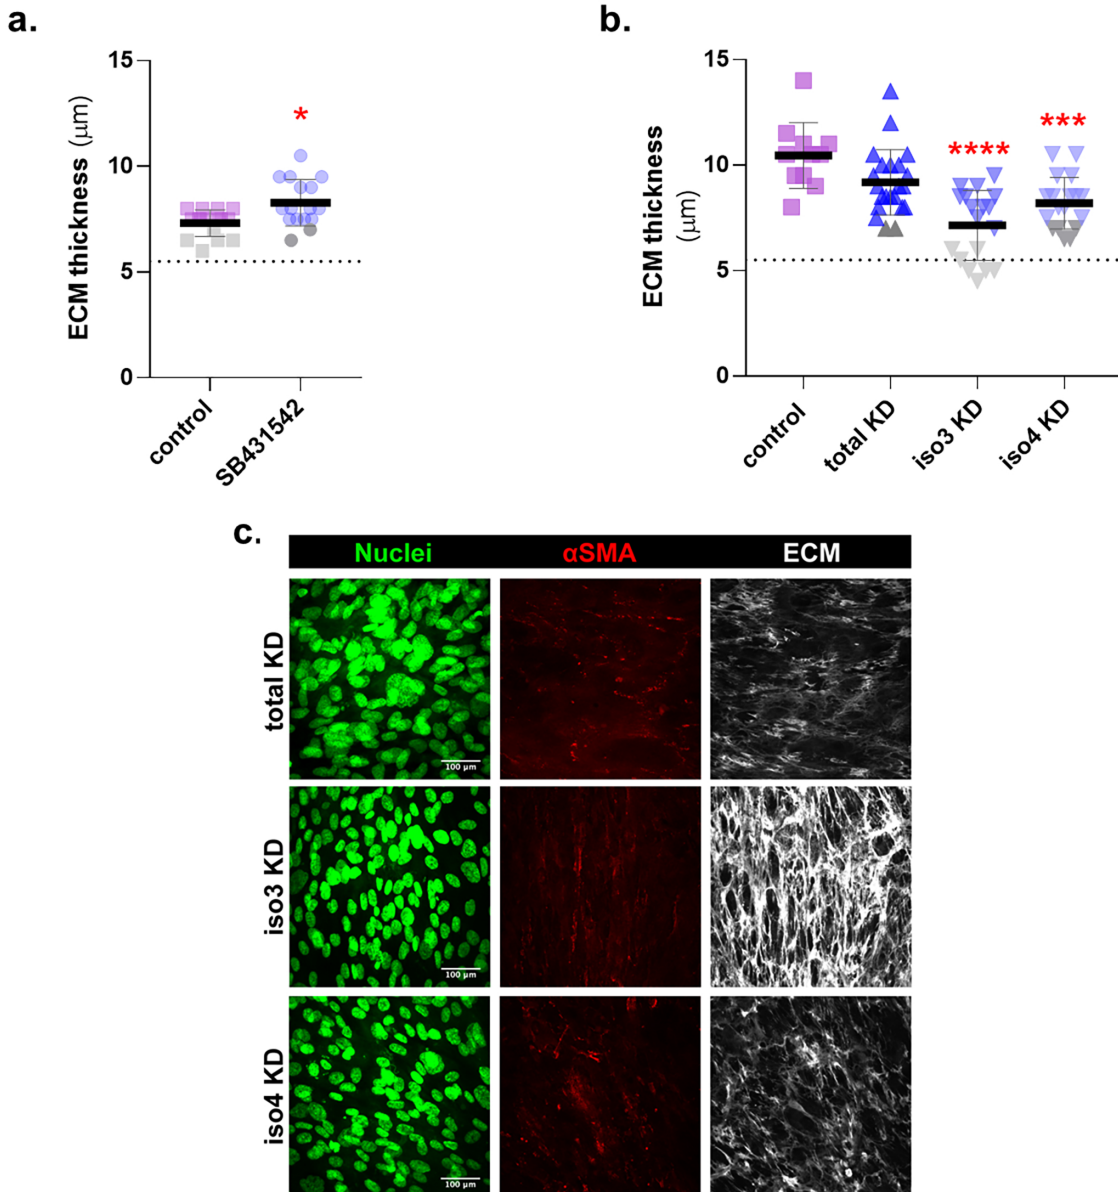

**Palladin knock down can compromise ECM fibrillogenesis.** Analyses of ECM thickness from samples used to generate graphs presented in main **Figures 2d-e (a)** and **3f-g (b)**. Note that a significant number of matrices obtained from palladin mutants (especially iso3) were compromised in their fibrillogenesis, albeit enough sample presenting with thicknesses measuring  $\sim 5.5\mu\text{m}$  (dotted line) or thicker. To avoid data misinterpretation, matrices thicker than  $7\mu\text{m}$  (colored as opposed to gray) were used for alignment assessments. The Mann Whitney test was used in **(a)** and one-way ANOVA, Dunnett's multiple comparisons test, in **(b)**. Asterisks represent statistical differences compared to control; \* $p < 0.05$ ; \*\*  $p < 0.01$ ; \*\*\* $p < 0.001$ ; \*\*\*\*  $p < 0.0001$ . **c.** representative confocal indirect immunofluorescent images showing nuclei (green),  $\alpha$ SMA (red), and fibronectin (ECM, white), corresponding to the  $\sim 50\%$  portion of palladin mutants deficient in substantial matrix production. Scale bars =  $100\mu\text{m}$ .

# Supplemental Figure 2

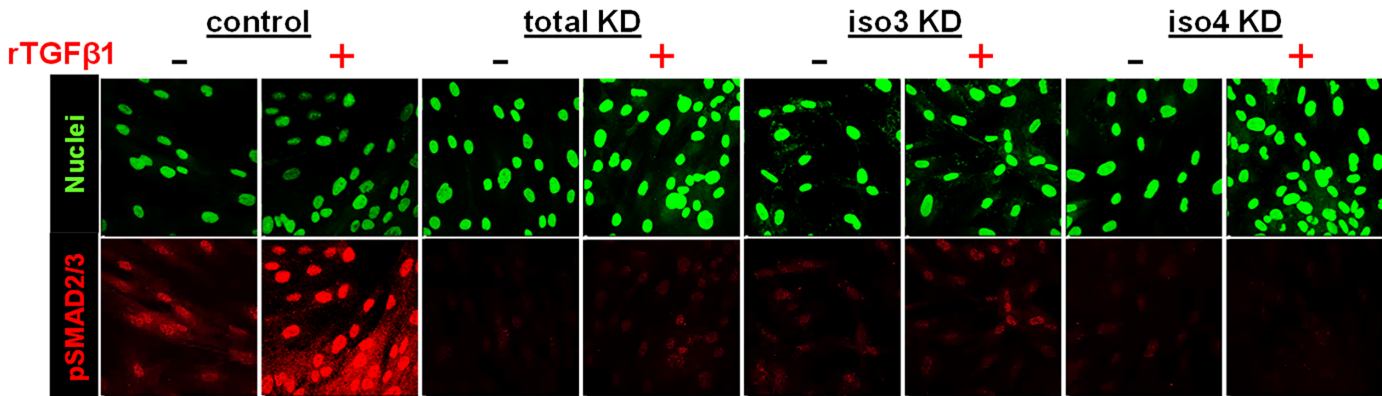

**CAFs used in this study can respond to recombinant TGFβ1 treatment.** Following overnight serum starvation, control CAFs and palladin KD CAFs, cultured under classic 2D conditions, were treated with recombinant TGFβ1 (rTGFβ1) for 2hrs. Samples were fixed and immuno-stained to observe levels and localization of pSMAD2/3 (red). Results show nuclear (green) localization of pSMAD2/3 was hindered in palladin mutants with the most extreme obstruction evident in iso4 KD CAFs.
